# Supplementary material for: Title： Comprehensive characterization of the genes in AP2/ERF family and their involvement in salt–alkali stress response during Nelumbo nucifera seed germination
Source: Research Square preprint supplement (doi:10.21203/rs.3.rs-7884677/v1), 2025-12-17
Supplement: Supplementary file 1 [file 286028ac6eadc56aeeee6626.pdf]

## Supplementary figures:

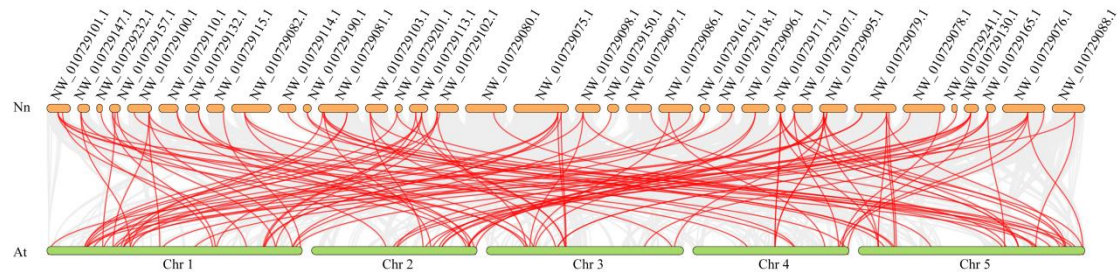

**Figure S1. Synteny analysis of AP2/ERF genes between *N. nucifera* and *A. thaliana*.**

Gray lines indicate all syntenic gene pairs between the two species, and red lines highlight the syntenic relationships specifically associated with *AP2/ERF* genes. Orange represents the chromosomal segments of *N. nucifera*, and green represents those of *A. thaliana*.

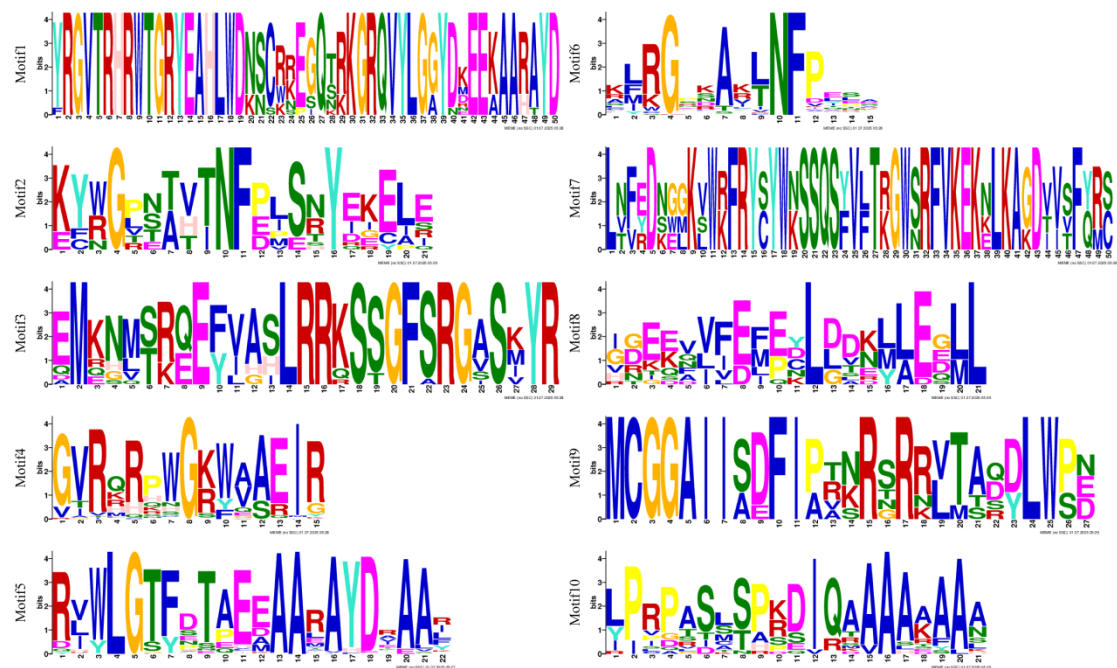

**Figure S2. Conserved motif analysis of AP2/ERF proteins in *N. nucifera*.**

A total of 10 distinct conserved motifs were identified among AP2/ERF family proteins using MEME Suite.

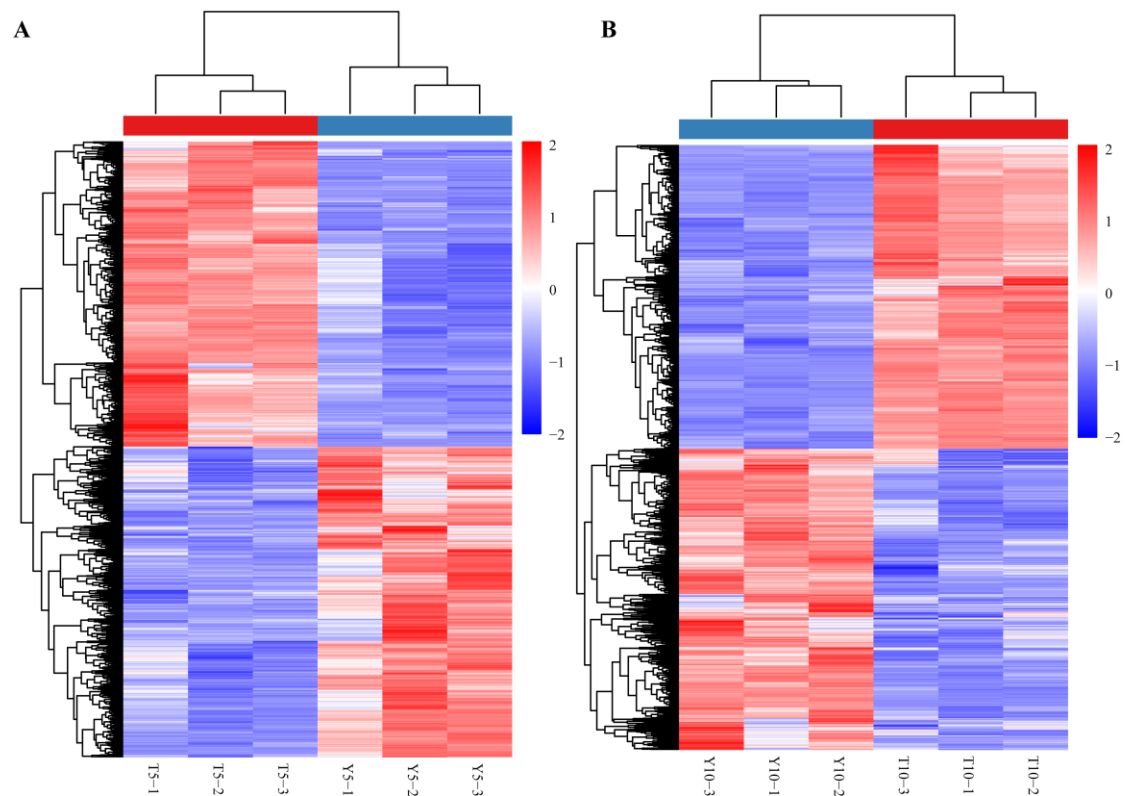

**Figure S3. Heatmaps of differentially expressed genes (DEGs) identified in T5 vs. Y5 and T10 vs. Y10 comparisons.**

(A-B) Heatmap showing expression patterns of DEGs between T5 vs. Y5 and T10 vs. Y10 groups. Red indicates upregulated genes, while blue represents downregulated genes. Gene expression levels were normalized and clustered to reveal expression trends under salt-alkaline stress at different treatment durations. The color scale represents normalized expression levels ( $\log_2$ -transformed values).

**Table S1. Primers and oligonucleotide probes were used in this study.**

| Primer name | Primer sequence (5'-3') |
|-------------|-------------------------|
| AP2-9F      | ACACCCGAGGATCGGTGAAG    |
| AP2-9R      | GAGTTTGAGTAACCGCCCAAGA  |
| ERF23F      | GATACGCTGCCGAGATAAGGG   |
| ERF23R      | CTTTAACCGAAGAAGCACCTC   |
| ERF15F      | TAATGAATTCTCGCCGGAATCT  |
| ERF15R      | CTTCGAACGCCTCTGTAGGACT  |
| ERF31F      | AACTCCCGACGATAAGTCGG    |

|         |                       |
|---------|-----------------------|
| ERF31R  | TGTCAAAGGTGCCAAGCCATA |
| ERF34F  | GCCAGTTGCCTGAAGCAGTT  |
| ERF34R  | ATCTCTGCTGCCCATTCCC   |
| DREB21F | AAGATTCCACCACACCATCG  |
| DREB21R | TGCCGCTGCTGTCTGGATAT  |
| ACTIN-F | ATGGCAGATTCCGAGGATATT |
| ACTIN-R | CTTCAGGAGCTACACGGAGC  |

---
